## Host cell $\text{Ca}^{2+}$ and protein kinase C regulate innate recognition of *Toxoplasma gondii*

Katherine S. Masek, Jim Fiore, Michael Leitges, Shi-Fang Yan, Bruce D. Freedman and Christopher A. Hunter

*Journal of Cell Science* 119, 4789 (2006) doi:10.1242/jcs.03319

There was an error published in *J. Cell Sci.* **119**, 4565-4573.

In Fig. 7C, the 1  $\mu\text{M}$  and 5  $\mu\text{M}$  bars were incorrectly labelled. The corrected figure and legend are shown below.

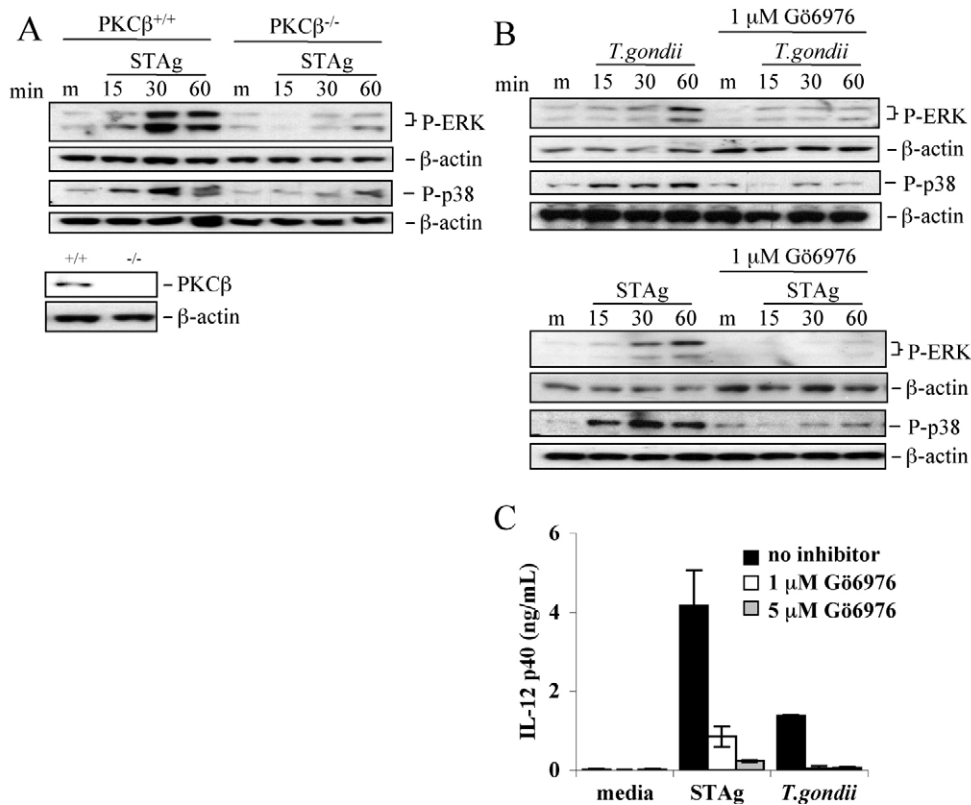

**Fig. 7.** Conventional PKC regulate *T. gondii*-induced MAPK activation and production of IL-12. (A) PKC $\beta^{-/-}$  and WT macrophages were stimulated with medium (m) or STAg (50  $\mu\text{g/ml}$ ) for the times indicated and whole cell lysates were used for immunoblotting for phospho-ERK1/2 and phospho-p38. Blots were then stripped and reprobbed for  $\beta$ -actin (top panels) and PKC $\beta$  (bottom panel). (B) WT macrophages were pre-treated with medium (m) or the conventional PKC inhibitor Gö6976 (1  $\mu\text{M}$ ), then treated with medium (m), infected with *T. gondii* (5:1) or stimulated with STAg (50  $\mu\text{g/ml}$ ). Whole cell lysates collected at the times indicated were immunoblotted for phospho-ERK1/2 and phospho-p38, then stripped and reprobbed for  $\beta$ -actin. (C) Macrophages treated with media (black bars), 5  $\mu\text{M}$  (grey bars), or 1  $\mu\text{M}$  (white bars) Gö6976 were infected (1:1) or stimulated with STAg (50  $\mu\text{g/ml}$ ) overnight, and the supernatants collected at 20 hours post-infection were assayed for IL-12p40 production by ELISA (error bars indicate s.e.m.). In each panel, results are representative of four to five experiments.

The authors apologise for this error.
